# Supplementary material
Source: publisher figshare collection journal article supplement (https://sage.figshare.com/ndownloader/files/21239796)
Supplement: Supplementary file 1 [file 21239796]

## **Supplementary material : methodological clarifications and additional Tables**

### **EUROMOD tax-benefit modelling**

EUROMOD simulates tax liabilities (direct taxes and social insurance contributions) and cash benefit entitlements on the basis of the tax-benefit rules in place and information available in the underlying dataset. The components of the tax-benefit system which are not simulated due to lack of information in the cross-sectional survey data (e.g. on previous employment), as well as market incomes, are taken directly from the data. EUROMOD is a static model: the arithmetic simulation of taxes and benefits takes no account of potential behavioural reactions of individuals. As such, EUROMOD is of value in terms of assessing the first order effects of tax-benefit policies and in understanding how tax-benefit policy reforms may affect income distributions, work incentives and government budgets in a partial equilibrium (see Sutherland and Figari (2013); Figari and Narazani (2015) for further information).

Table A1: Basic poverty and inequality indicators for Italy, Poland, Belgium and Sweden, individuals aged between 18-64 years old, 2018.

|                                                                        | Italy | Poland | Belgium | Sweden |
|------------------------------------------------------------------------|-------|--------|---------|--------|
| At risk of poverty or social exclusion (%)                             | 20.6  | 17.3   | 15.5    | 16.2   |
| In-work poverty (%)                                                    | 11.8  | 10.9   | 4.7     | 6.8    |
| Gini (market income, before taxes and transfers)                       | 0.452 | 0.408  | 0.429   | 0.364  |
| Gini (disposable income, after taxes and transfers)                    | 0.339 | 0.296  | 0.268   | 0.269  |
| Wage inequality P50/P10 (gross monthly earnings, full-time equivalent) | 1.50  | 1.92   | 1.34    | 1.36   |

Source: At risk of poverty and in-work poverty based on EUROSTAT, EU-SILC (2018). Wage inequality refers to 2014 and is based on OECD Earnings Database (2018). Gini coefficients refer to 2015 and come from the OECD Income Distribution Database (2018). Data extracted on the 26th of June 2018.

Table A2: Basic descriptive statistics of the four subsamples

#### A. Belgium

|                                   | Couples, both available |        | Couples, one available | Single male | Single female |
|-----------------------------------|-------------------------|--------|------------------------|-------------|---------------|
|                                   | Male                    | Female |                        |             |               |
| Average working time/week (hours) | 36.8                    | 26.9   | 23.5                   | 31          | 25.8          |
| Average hourly gross wage (€)     | 20.5                    | 17.2   | 17.7                   | 18.7        | 17            |
| Participation rate (%)            | 91.2                    | 80.8   | 64.1                   | 77.9        | 76.6          |
| Average age (years)               | 41.5                    | 39     | 48.8                   | 42.8        | 43.6          |
| Higher education degree (%)       | 43.4                    | 50.8   | 36.8                   | 39.1        | 39.8          |
| Presence of child (0-18) (%)      | 65.1                    |        | 36.1                   | 7.5         | 38.4          |
| Income quintile 1 (%)             | 11.7                    |        | 21.5                   | 25.2        | 35.2          |
| Income quintile 2 (%)             | 12.5                    |        | 24                     | 16.8        | 22            |
| Income quintile 3 (%)             | 18.8                    |        | 21.4                   | 17.4        | 20.8          |
| Income quintile 4 (%)             | 25.2                    |        | 16.2                   | 18.8        | 12.5          |
| Income quintile 5 (%)             | 31.8                    |        | 16.9                   | 21.9        | 9.5           |
| Number of households              | 1,494                   |        | 674                    | 453         | 631           |

## B. Italy

|                                   | Couples, both available |        | Couples, one available | Single male | Single female |
|-----------------------------------|-------------------------|--------|------------------------|-------------|---------------|
|                                   | Male                    | Female |                        |             |               |
| Average working time/week (hours) | 38.3                    | 23     | 21.5                   | 36.1        | 30.3          |
| Average hourly gross wage (€)     | 15.8                    | 15.4   | 19.7                   | 15.5        | 15.7          |
| Participation rate (%)            | 95.5                    | 68     | 60.4                   | 91.2        | 83.5          |
| Average age (years)               | 44.1                    | 41.2   | 47.7                   | 42.2        | 44.8          |
| Higher education degree (%)       | 14.4                    | 18.3   | 17.6                   | 19.1        | 24.2          |
| Presence of child (0-18) (%)      | 68.7                    |        | 46.8                   | 4.8         | 28.8          |
| Income quintile 1 (%)             | 13.3                    |        | 18.7                   | 16.1        | 27.5          |
| Income quintile 2 (%)             | 17                      |        | 17.7                   | 8.6         | 17.5          |
| Income quintile 3 (%)             | 18.6                    |        | 16.5                   | 13.3        | 18            |
| Income quintile 4 (%)             | 25.2                    |        | 19.2                   | 26.1        | 19.5          |
| Income quintile 5 (%)             | 25.9                    |        | 26.9                   | 36          | 17.6          |
| Number of households              | 3,693                   |        | 2,394                  | 1,112       | 1,519         |

## C. Poland

|                                   | Couples, both available |        | Couples, one available | Single male | Single female |
|-----------------------------------|-------------------------|--------|------------------------|-------------|---------------|
|                                   | Male                    | Female |                        |             |               |
| Average working time/week (hours) | 40.7                    | 29.9   | 32                     | 33.8        | 29.8          |
| Average hourly gross wage (€)     | 19.7                    | 15.7   | 17.4                   | 19          | 16.4          |
| Participation rate (%)            | 96                      | 78.3   | 79.7                   | 83.4        | 78            |
| Average age (years)               | 40.9                    | 38.7   | 46.2                   | 43.9        | 44.7          |
| Higher education degree (%)       | 24.5                    | 35.8   | 25.5                   | 26.3        | 30.7          |
| Presence of child (0-18) (%)      | 68.8                    |        | 46.8                   | 8.2         | 39.6          |
| Income quintile 1 (%)             | 16.4                    |        | 21.8                   | 29.9        | 22.8          |
| Income quintile 2 (%)             | 16.7                    |        | 16.4                   | 15.1        | 23.8          |
| Income quintile 3 (%)             | 17.8                    |        | 17.1                   | 16.3        | 19            |
| Income quintile 4 (%)             | 21.2                    |        | 19                     | 16          | 16.2          |
| Income quintile 5 (%)             | 27.9                    |        | 25.8                   | 22.7        | 18.2          |
| Number of households              | 2,556                   |        | 1,498                  | 331         | 667           |

#### D. Sweden

|                                   | Couples, both available |        | Couples, one available | Single male | Single female |
|-----------------------------------|-------------------------|--------|------------------------|-------------|---------------|
|                                   | Male                    | Female |                        |             |               |
| Average working time/week (hours) | 32.1                    | 30     | 31.3                   | 32          | 28.9          |
| Average hourly gross wage (€)     | 28                      | 24.2   | 37.3                   | 24          | 26.2          |
| Participation rate (%)            | 98.4                    | 95.6   | 95.1                   | 95.3        | 94.2          |
| Average age (years)               | 43.9                    | 41.6   | 48                     | 41.3        | 43.8          |
| Higher education degree (%)       | 35.7                    | 48.5   | 36.9                   | 23          | 41.9          |
| Presence of child (0-18) (%)      | 62.8                    |        | 39.2                   | 13.5        | 32.3          |
| Income quintile 1 (%)             | 7.2                     |        | 14.2                   | 22.3        | 32            |
| Income quintile 2 (%)             | 13.4                    |        | 13.5                   | 19.8        | 23.2          |
| Income quintile 3 (%)             | 20.1                    |        | 20.1                   | 23.8        | 21.3          |
| Income quintile 4 (%)             | 26                      |        | 22.9                   | 21.8        | 12.7          |
| Income quintile 5 (%)             | 33.4                    |        | 29.3                   | 12.5        | 108           |
| Number of households              | 2,109                   |        | 843                    | 400         | 465           |

Source: own calculations based on EUROMOD (using EU-SILC 2012 for BE, IT, PL and SE)

Table A3: Estimated parameters of the quadratic utility function for single females

**A. Belgium**

|                                            | Coefficient |     | Standard error |
|--------------------------------------------|-------------|-----|----------------|
| <b>Disposable household income</b>         |             |     |                |
| Work experience female                     | 0.0145      | *** | 0.003          |
| Work experience female squared             | -0.000      | *** | 0.000          |
| Constant                                   | 1.4644      | *   | 0.758          |
| <b>Disposable household income squared</b> | -0.178      | *** | 0.046          |
| <b>Non-working time</b>                    |             |     |                |
| Presence of child 0-3y <sup>1</sup>        | 0.0278      | *** | 0.010          |
| Presence of child 4-6y <sup>1</sup>        | 0.010       |     | 0.010          |
| Presence of child 7-12y <sup>1</sup>       | 0.003       |     | 0.006          |
| Age                                        | -0.001      |     | 0.002          |
| Age squared                                | 0.000       |     | 0.000          |
| Constant                                   | 0.490       | *** | 0.069          |
| <b>Non-working time squared</b>            | -0.004      | *** | 0.000          |
| <b>Non-working time * Consumption</b>      | -0.002      |     | 0.007          |
| <b>Dummy for working part-time</b>         | 1.584       | *** | 0.138          |

Note: \*: p<0.1; \*\*:p<0.05; \*\*\*:p<0.01. Excluded categories are <sup>1</sup>: Presence of child 13-18y. Estimations for the other subgroups are available from the authors upon request.

**B. Italy**

|                                            | Coefficient |     | Standard error |
|--------------------------------------------|-------------|-----|----------------|
| <b>Disposable household income</b>         |             |     |                |
| Work experience female                     | 0.031       | *** | 0.002          |
| Work experience female squared             | -0.000      | *** | 0.000          |
| Constant                                   | 4.085       | *** | 0.413          |
| <b>Disposable household income squared</b> | -0.217      | *** | 0.038          |
| <b>Non-working time</b>                    |             |     |                |
| Number of children in household            | 0.022       | *** | 0.004          |
| Age                                        | -0.019      | *** | 0.003          |
| Age squared                                | 0.000       | *** | 0.000          |
| Middle education <sup>1</sup>              | -0.004      |     | 0.013          |
| Higher education <sup>1</sup>              | -0.018      | **  | 0.008          |
| EU-migrant <sup>2</sup>                    | -0.1        | *** | 0.014          |
| Non EU-migrant <sup>2</sup>                | -0.114      | *** | 0.012          |
| Regio2 <sup>3</sup>                        | -0.009      |     | 0.009          |
| Regio3 <sup>3</sup>                        | -0.039      | *** | 0.009          |
| Regio4 <sup>3</sup>                        | -0.013      |     | 0.009          |
| Regio5 <sup>3</sup>                        | 0.004       |     | 0.013          |
| Constant                                   | 1.206       | *** | 0.069          |
| <b>Non-working time squared</b>            | -0.006      | *** | 0.000          |
| <b>Non-working time * Consumption</b>      | -0.015      | *** | 0.003          |
| <b>Dummy for working part-time</b>         | 2.888       | *** | 0.108          |

Note: \*: p<0.1; \*\*:p<0.05; \*\*\*:p<0.01. Excluded categories are <sup>1</sup>: Lower education; <sup>2</sup>: Non-migrant; <sup>3</sup>: Regio1. Estimations for the other subgroups are available from the authors upon request.

### C. Poland

|                                            | Coefficient |     | Standard error |
|--------------------------------------------|-------------|-----|----------------|
| <b>Disposable household income</b>         |             |     |                |
| Work experience female                     | 0.001       |     | 0.003          |
| Work experience female squared             | 0.000       |     | 0.000          |
| Constant                                   | 0.082       |     | 0.550          |
| <b>Disposable household income squared</b> | -0.021      |     | 0.036          |
| <b>Non-working time</b>                    |             |     |                |
| Number of children in household            | -0.018      | *** | 0.004          |
| Age                                        | -0.013      | *** | 0.003          |
| Age squared                                | 0.000       | *** | 0.000          |
| Middle education <sup>1</sup>              | -0.031      | **  | 0.014          |
| Higher education <sup>1</sup>              | 0.008       |     | 0.010          |
| Migrant <sup>2</sup>                       | -0.202      |     | 0.136          |
| Regio2 <sup>3</sup>                        | 0.023       | **  | 0.010          |
| Regio3 <sup>3</sup>                        | 0.019       |     | 0.011          |
| Regio4 <sup>3</sup>                        | 0.020       |     | 0.010          |
| Regio5 <sup>3</sup>                        | 0.008       |     | 0.011          |
| Regio6 <sup>3</sup>                        | 0.012       |     | 0.010          |
| Constant                                   | 0.472       | *** | 0.074          |
| <b>Non-working time squared</b>            | -0.002      | *** | 0.000          |
| <b>Non-working time * Consumption</b>      | 0.057       | *** | 0.008          |
| <b>Dummy for working part-time</b>         | 2.329       | *** | 0.154          |

Note: \*: p<0.1; \*\*:p<0.05; \*\*\*:p<0.01. Excluded categories are <sup>1</sup>: Lower education; <sup>2</sup>: Non-migrant; <sup>3</sup>: Regio1. Estimations for the other subgroups are available from the authors upon request.

### D. Sweden

|                                            | Coefficient |     | Standard error |
|--------------------------------------------|-------------|-----|----------------|
| <b>Disposable household income</b>         |             |     |                |
| Work experience female                     | 0.002       | *** | 0.000          |
| Work experience female squared             | -0.000      | *** | 0.000          |
| Constant                                   | 0.639       | *** | 0.201          |
| <b>Disposable household income squared</b> | -0.004      | **  | 0.002          |
| <b>Non-working time</b>                    |             |     |                |
| Number of children in household            | -0.004      |     | 0.010          |
| Age                                        | 0.011       | **  | 0.005          |
| Age squared                                | -0.000      | *** | 0.000          |
| Middle education <sup>1</sup>              | -0.051      |     | 0.031          |
| Higher education <sup>1</sup>              | -0.109      | *** | 0.018          |
| EU-Migrant <sup>2</sup>                    | 0.014       |     | 0.031          |
| Non EU-Migrant <sup>2</sup>                | 0.053       | **  | 0.021          |
| Regio2 <sup>3</sup>                        | 0.009       |     | 0.017          |
| Regio3 <sup>3</sup>                        | 0.006       |     | 0.022          |
| Constant                                   | 1.069       | *** | 0.181          |
| <b>Non-working time squared</b>            | -0.008      | *** | 0.001          |
| <b>Non-working time * Consumption</b>      | 0.002       |     | 0.002          |
| <b>Dummy for working part-time</b>         | 1.790       | *** | 0.208          |

Note: \*: p<0.1; \*\*:p<0.05; \*\*\*:p<0.01. Excluded categories are <sup>1</sup>: Lower education; <sup>2</sup>: Non-migrant; <sup>3</sup>: Regio1. Estimations for the other subgroups are available from the authors upon request.

Source: own calculations based on EUROMOD (using EU-SILC 2012 for BE, IT, PL and SE)

Table A4: Poverty rates for the different budget-neutral scenarios of in-work benefits, 2015

| <b>Individual-based IWB</b>                       | Belgium     | Italy       | Poland      | Sweden      | <b>Household-based IWB</b>                        | Belgium     | Italy       | Poland      | Sweden      |
|---------------------------------------------------|-------------|-------------|-------------|-------------|---------------------------------------------------|-------------|-------------|-------------|-------------|
| <b>Scenario</b>                                   |             |             |             |             | <b>Scenario</b>                                   |             |             |             |             |
| Existing system                                   | 10.1        | 17.5        | 16.9        | 13.7        | Existing system                                   | 10.1        | 17.5        | 16.9        | 13.7        |
| <b><i>First order, fixed poverty line</i></b>     |             |             |             |             | <b><i>First order, fixed poverty line</i></b>     |             |             |             |             |
| 0. Abolish existing                               | <i>10.3</i> | <i>18.5</i> | <i>16.9</i> | <i>15.9</i> | 0. Abolish existing                               | <i>10.3</i> | <i>18.5</i> | <i>16.9</i> | <i>15.9</i> |
| 1. Lump sum                                       | <i>9.4</i>  | <i>16.9</i> | <i>16.5</i> | <i>14.2</i> | 1. Lump sum                                       | <i>9.1</i>  | <i>16.7</i> | <i>16.4</i> | <i>14.0</i> |
| 2A. Threshold based on gross income               | <i>8.5</i>  | <i>16.1</i> | <i>16.2</i> | <i>12.3</i> | 2B. Threshold based on gross income               | <i>7.7</i>  | <i>15.5</i> | <i>15.6</i> | <i>11.4</i> |
| 2C. Threshold based on hourly wage                | <i>8.5</i>  | <i>16.5</i> | <i>16.1</i> | <i>12.7</i> |                                                   |             |             |             |             |
| 3A. Tapering-out                                  | <i>8.6</i>  | <i>16.1</i> | <i>16.1</i> | <i>12.5</i> | 3B. Tapering-out                                  | <i>8.9</i>  | <i>16.6</i> | <i>16.3</i> | <i>13.6</i> |
| 4A. Tapering-in                                   | <i>8.7</i>  | <i>16.1</i> | <i>16.0</i> | <i>12.7</i> | 4B. Tapering-in                                   | <i>8.3</i>  | <i>15.6</i> | <i>15.6</i> | <i>12.0</i> |
| <b><i>Second order, fixed poverty line</i></b>    |             |             |             |             | <b><i>Second order, fixed poverty line</i></b>    |             |             |             |             |
| 0. Abolish existing                               | <i>10.4</i> | <i>18.0</i> | <i>16.9</i> | <i>16.6</i> | 0. Abolish existing                               | <i>10.4</i> | <i>18.0</i> | <i>16.9</i> | <i>16.6</i> |
| 1. Lump sum                                       | <i>9.1</i>  | <i>17.0</i> | <i>16.7</i> | <i>15.4</i> | 1. Lump sum                                       | <i>9.0</i>  | <i>16.9</i> | <i>16.6</i> | <i>15.4</i> |
| 2A. Threshold based on gross income               | <i>8.4</i>  | <i>17.4</i> | <i>16.7</i> | <i>16.2</i> | 2B. Threshold based on gross income               | <i>8.0</i>  | <i>17.3</i> | <i>16.6</i> | <i>16.6</i> |
| 2C. Threshold based on hourly wage                | <i>8.7</i>  | <i>17.6</i> | <i>16.8</i> | <i>15.9</i> |                                                   |             |             |             |             |
| 3A. Tapering-out                                  | <i>8.6</i>  | <i>17.3</i> | <i>16.6</i> | <i>16.1</i> | 3B. Tapering-out                                  | <i>9.1</i>  | <i>17.0</i> | <i>16.6</i> | <i>15.6</i> |
| 4A. Tapering-in                                   | <i>8.6</i>  | <i>17.3</i> | <i>16.6</i> | <i>15.8</i> | 4B. Tapering-in                                   | <i>8.2</i>  | <i>17.1</i> | <i>16.6</i> | <i>16.3</i> |
| <b><i>Second order, floating poverty line</i></b> |             |             |             |             | <b><i>Second order, floating poverty line</i></b> |             |             |             |             |
| 0. Abolish existing                               | <i>10.2</i> | <i>17.7</i> | <i>16.9</i> | <i>13.6</i> | 0. Abolish existing                               | <i>10.2</i> | <i>17.7</i> | <i>16.9</i> | <i>13.6</i> |
| 1. Lump sum                                       | <i>9.7</i>  | <i>17.2</i> | <i>16.8</i> | <i>13.6</i> | 1. Lump sum                                       | <i>9.6</i>  | <i>17.1</i> | <i>16.8</i> | <i>13.6</i> |
| 2A. Threshold based on gross income               | <i>9.0</i>  | <i>17.3</i> | <i>16.8</i> | <i>13.5</i> | 2B. Threshold based on gross income               | <i>8.4</i>  | <i>17.2</i> | <i>16.7</i> | <i>13.3</i> |
| 2C. Threshold based on hourly wage                | <i>9.1</i>  | <i>17.5</i> | <i>16.9</i> | <i>13.5</i> |                                                   |             |             |             |             |
| 3A. Tapering-out                                  | <i>9.3</i>  | <i>17.2</i> | <i>16.8</i> | <i>13.5</i> | 3B. Tapering-out                                  | <i>9.7</i>  | <i>17.1</i> | <i>16.8</i> | <i>13.6</i> |
| 4A. Tapering-in                                   | <i>9.4</i>  | <i>17.2</i> | <i>16.8</i> | <i>13.4</i> | 4B. Tapering-in                                   | <i>8.8</i>  | <i>17.0</i> | <i>16.7</i> | <i>13.2</i> |

Note: Poverty rates are calculated using 60% of median equivalent income as the poverty line. The poverty line is calculated on the basis of either the income distribution in the existing system ('fixed poverty line') or the changed income distribution ('floating poverty line'). Second order poverty rates take account of changes in labour supply. Statistically significant poverty rates at 5% confidence interval are put in italics; the difference relates to a comparison with the previous scenario, as described in Table 2.

Source: own calculations based on EUROMOD (using EU-SILC 2012 for BE, IT, PL and SE).

Table A4: Work incentives, share of individuals working specified number of hours for the different budget-neutral scenarios of in-work benefits, 2015

| Individual-based IWB                |         |          |          |          |          | Household-based IWB                 |         |          |          |          |          |
|-------------------------------------|---------|----------|----------|----------|----------|-------------------------------------|---------|----------|----------|----------|----------|
|                                     | 0 hours | 19 hours | 30 hours | 38 hours | 50 hours |                                     | 0 hours | 19 hours | 30 hours | 38 hours | 50 hours |
| <b>Belgium</b>                      |         |          |          |          |          |                                     |         |          |          |          |          |
| Existing system                     | 21.8    | 11.1     | 10.6     | 45.3     | 12.3     | Existing system                     | 21.8    | 11.1     | 10.6     | 45.3     | 12.3     |
| 0. Abolish existing                 | 22.1    | 11.1     | 10.5     | 45.0     | 12.4     | 0. Abolish existing                 | 22.1    | 11.1     | 10.5     | 45.0     | 12.4     |
| 1. Lump sum                         | 20.4    | 11.5     | 10.8     | 45.8     | 12.4     | 1. Lump sum                         | 20.8    | 11.4     | 10.8     | 45.7     | 12.3     |
| 2A. Threshold based on gross income | 19.6    | 15.4     | 11.3     | 43.2     | 11.6     | 2B. Threshold based on gross income | 21.1    | 13.5     | 11.1     | 44.0     | 11.3     |
| 2C. Threshold based on hourly wage  | 20.8    | 11.5     | 10.8     | 45.6     | 12.4     |                                     |         |          |          |          |          |
| 3A. Tapering-out                    | 19.8    | 14.0     | 11.5     | 44.2     | 11.6     | 3B. Tapering-out                    | 21.0    | 11.8     | 10.8     | 45.3     | 12.1     |
| 4A. Tapering-in                     | 20.1    | 12.2     | 11.5     | 45.5     | 11.7     | 4B. Tapering-in                     | 20.9    | 13.0     | 11.2     | 44.6     | 11.4     |
| <b>Italy</b>                        | 0 hours | 20 hours | 30 hours | 40 hours | 50 hours |                                     | 0 hours | 20 hours | 30 hours | 40 hours | 50 hours |
| Existing system                     | 21.6    | 10.3     | 8.2      | 49.9     | 10.0     | Existing system                     | 21.6    | 10.3     | 8.2      | 49.9     | 10.0     |
| 0. Abolish existing                 | 22.1    | 9.5      | 7.7      | 50.3     | 10.3     | 0. Abolish existing                 | 22.1    | 9.5      | 7.7      | 50.3     | 10.3     |
| 1. Lump sum                         | 21.3    | 9.8      | 7.9      | 50.7     | 10.3     | 1. Lump sum                         | 21.8    | 9.7      | 7.8      | 50.5     | 10.3     |
| 2A. Threshold based on gross income | 21.5    | 11.1     | 7.9      | 49.3     | 10.2     | 2B. Threshold based on gross income | 22.4    | 10.5     | 8.0      | 49.0     | 10.1     |
| 2C. Threshold based on hourly wage  | 21.8    | 9.7      | 7.8      | 50.4     | 10.3     |                                     |         |          |          |          |          |
| 3A. Tapering-out                    | 21.5    | 11.1     | 8.0      | 49.3     | 10.1     | 3B. Tapering-out                    | 21.9    | 9.9      | 7.8      | 50.2     | 10.2     |
| 4A. Tapering-in                     | 21.6    | 10.3     | 8.0      | 49.9     | 10.2     | 4B. Tapering-in                     | 22.3    | 10.7     | 8.1      | 49.0     | 10.0     |
| <b>Poland</b>                       | 0 hours | 20 hours | 30 hours | 40 hours | 50 hours |                                     | 0 hours | 20 hours | 30 hours | 40 hours | 50 hours |
| Existing system                     | 17.0    | 7.5      | 7.9      | 51.0     | 17.7     | Existing system                     | 17.0    | 7.5      | 7.9      | 51.0     | 17.7     |
| 0. Abolish existing                 | 17.0    | 7.5      | 7.9      | 51.0     | 17.7     | 0. Abolish existing                 | 17.0    | 7.5      | 7.9      | 51.0     | 17.7     |
| 1. Lump sum                         | 16.8    | 7.6      | 7.9      | 51.1     | 17.6     | 1. Lump sum                         | 16.8    | 7.6      | 7.9      | 51.1     | 17.6     |
| 2A. Threshold based on gross income | 16.7    | 7.9      | 8.0      | 50.8     | 17.6     | 2B. Threshold based on gross income | 16.8    | 7.8      | 8.0      | 50.9     | 17.5     |
| 2C. Threshold based on hourly wage  | 16.9    | 7.6      | 7.9      | 51.0     | 17.7     |                                     |         |          |          |          |          |
| 3A. Tapering-out                    | 16.7    | 7.9      | 8.0      | 50.8     | 17.6     | 3B. Tapering-out                    | 16.9    | 7.6      | 7.9      | 51.0     | 17.6     |
| 4A. Tapering-in                     | 16.8    | 7.7      | 8.0      | 50.9     | 17.6     | 4B. Tapering-in                     | 16.8    | 7.8      | 8.0      | 50.9     | 17.5     |
| <b>Sweden</b>                       | 0 hours | 16 hours | 26 hours | 36 hours | 50 hours |                                     | 0 hours | 16 hours | 26 hours | 36 hours | 50 hours |
| Existing system                     | 7.7     | 9.2      | 14.5     | 66.1     | 3.5      | Existing system                     | 7.7     | 9.2      | 14.5     | 66.1     | 3.5      |
| 0. Abolish existing                 | 9.4     | 9.4      | 13.9     | 64.5     | 3.8      | 0. Abolish existing                 | 9.4     | 9.4      | 13.9     | 64.5     | 3.8      |
| 1. Lump sum                         | 8.7     | 9.9      | 14.3     | 64.5     | 3.7      | 1. Lump sum                         | 8.9     | 9.8      | 14.2     | 64.4     | 3.7      |
| 2A. Threshold based on gross income | 8.4     | 12.7     | 14.8     | 61.5     | 3.6      | 2B. Threshold based on gross income | 9.4     | 12.5     | 16.2     | 59.5     | 3.5      |
| 2C. Threshold based on hourly wage  | 9.0     | 9.8      | 14.0     | 64.4     | 3.7      |                                     |         |          |          |          |          |
| 3A. Tapering-out                    | 8.5     | 12.2     | 15.5     | 61.3     | 3.6      | 3B. Tapering-out                    | 9.0     | 10.4     | 14.8     | 63.3     | 3.6      |
| 4A. Tapering-in                     | 8.5     | 10.5     | 16.1     | 62.4     | 3.6      | 4B. Tapering-in                     | 9.0     | 12.1     | 17.0     | 59.5     | 3.4      |

Note: Statistically significant differences at 5% confidence interval are put in italics; the difference relates to a comparison with the previous scenario, as described in Table 2.

Source: own calculations based on EUROMOD (using EU-SILC 2012 for BE, IT, PL and SE)
